# Supplementary material
Source: ML conference proceedings conference paper supplement (https://openaccess.thecvf.com/content/ICCV2021/html/Rangwani_S3VAADA_Submodular_Subset_ICCV_2021_paper.html)
Supplement: Supplementary file 1 [file Rangwani_S3VAADA_Submodular_Subset_ICCV_2021_supplemental.zip]

Archive with 2 entries (2 files):
- 10567-supp.mp4
- 10567-supp.pdf
